# Supplementary material for: Exploration of the Mechanism of the Dimerization of Hydroxymethylsilanetriol Using Electronic Structure Methods
Source: PubMed Central journal article supplement — ACS Omega. 2022 Jan 7;7(3):2661–70. doi: 10.1021/acsomega.1c05027 (PMC8792941; doi:10.1021/acsomega.1c05027), 2022-01-07
Supplement: ao1c05027_si_001.pdf [file ao1c05027_si_001.pdf]

## Supplementary Information

### Exploration of the mechanism of the dimerization of Hydroxymethylsilanetriol using electronic structure methods.

**Khaoula Maghrebi,<sup>1,2</sup> Safa Gam <sup>1,2</sup>, Bechir Hammami,<sup>1,3</sup> Atheer Alsadiri,<sup>3</sup> Manef Abderrabba,<sup>2</sup> Sabri Messaoudi <sup>1,2,3</sup>\***

<sup>1</sup> Faculty of Sciences of Bizerte FSB, University of Carthage, 7021 Jarzouna, Tunisia.

<sup>2</sup> Laboratory of Materials, Molecules and Applications, IPEST, University of Carthage, Sidi Bou Said Road, B.P. 51 2070, La Marsa, Tunisia.

<sup>3</sup> Department of Chemistry, College of Science, Qassim University, Buraidah 51452, Saudi Arabia  
Email : [sabri\\_messaoudi@yahoo.fr](mailto:sabri_messaoudi@yahoo.fr)

**Supporting Information : Cartesian coordinates and energies of important stationary points (Optimized geometrical structures at B3LYP/6-31+G(d) level using the SMD solvation model) :**

#### 1. Formation of dimer D1 (Si-O-C-Si)

- Structure : RC

Energy : E= -1264.56587420 a.u.

Cartesian coordinates :

Input orientation:

| Center Number | Atomic Number | Atomic Type | Coordinates (Angstroms) |           |           |
|---------------|---------------|-------------|-------------------------|-----------|-----------|
|               |               |             | X                       | Y         | Z         |
| 1             | 14            | 0           | 2.661786                | -0.285438 | -0.028299 |
| 2             | 8             | 0           | 1.533277                | -1.440683 | 0.341586  |
| 3             | 1             | 0           | 0.600381                | -1.306189 | 0.046207  |
| 4             | 8             | 0           | 4.079878                | -0.802474 | 0.677168  |
| 5             | 1             | 0           | 3.998613                | -1.481096 | 1.368161  |
| 6             | 8             | 0           | 2.897629                | -0.095401 | -1.666126 |
| 7             | 1             | 0           | 1.472153                | 2.154394  | -1.138677 |
| 8             | 6             | 0           | 2.242330                | 1.457564  | 0.565839  |
| 9             | 1             | 0           | 1.871618                | 1.428028  | 1.595371  |
| 10            | 1             | 0           | 3.145177                | 2.083905  | 0.573112  |
| 11            | 8             | 0           | 1.206007                | 2.123290  | -0.203791 |
| 12            | 14            | 0           | -2.075922               | 0.092947  | 0.192589  |
| 13            | 8             | 0           | -1.110970               | -1.130753 | -0.441003 |
| 14            | 1             | 0           | -1.136325               | -1.250223 | -1.406696 |
| 15            | 8             | 0           | -2.045402               | -0.156749 | 1.838163  |
| 16            | 1             | 0           | -2.351666               | -1.024202 | 2.153158  |
| 17            | 6             | 0           | -3.812567               | 0.058708  | -0.527923 |

|    |   |   |           |           |           |
|----|---|---|-----------|-----------|-----------|
| 18 | 1 | 0 | -3.774383 | 0.155838  | -1.622647 |
| 19 | 1 | 0 | -4.381169 | 0.919203  | -0.147165 |
| 20 | 8 | 0 | -4.457223 | -1.178656 | -0.152499 |
| 21 | 1 | 0 | -5.360914 | -1.169134 | -0.510674 |
| 22 | 8 | 0 | -1.462524 | 1.591182  | -0.106960 |
| 23 | 1 | 0 | 3.106004  | -0.891267 | -2.184677 |
| 24 | 1 | 0 | -0.476514 | 1.713794  | -0.097443 |

• Structure : TS

Energy : E= -1264.51289440 a.u.

Cartesian coordinates :

Input orientation:

| Center<br>Number | Atomic<br>Number | Atomic<br>Type | Coordinates (Angstroms) |           |           |
|------------------|------------------|----------------|-------------------------|-----------|-----------|
|                  |                  |                | X                       | Y         | Z         |
| 1                | 14               | 0              | -2.431173               | -0.076422 | -0.070432 |
| 2                | 8                | 0              | -1.963579               | -0.060677 | 1.520001  |
| 3                | 1                | 0              | -1.014197               | 0.120537  | 1.711452  |
| 4                | 8                | 0              | -3.716166               | -1.119605 | -0.216917 |
| 5                | 1                | 0              | -3.641031               | -1.973870 | 0.242257  |
| 6                | 8                | 0              | -2.939711               | 1.408621  | -0.610481 |
| 7                | 1                | 0              | 0.236268                | 1.332969  | -0.779295 |
| 8                | 6                | 0              | -1.016223               | -0.576523 | -1.225087 |
| 9                | 1                | 0              | -0.735829               | -1.622794 | -1.076574 |
| 10               | 1                | 0              | -1.307087               | -0.459891 | -2.273920 |
| 11               | 8                | 0              | 0.198191                | 0.217134  | -1.040381 |
| 12               | 14               | 0              | 1.492534                | 0.057113  | 0.217377  |
| 13               | 8                | 0              | 0.858780                | 0.185375  | 1.788078  |
| 14               | 1                | 0              | 0.945060                | -0.655377 | 2.271340  |
| 15               | 8                | 0              | 1.542313                | -1.657359 | 0.177414  |
| 16               | 1                | 0              | 2.387744                | -1.970072 | -0.191738 |
| 17               | 6                | 0              | 3.274901                | 0.450297  | -0.299840 |
| 18               | 1                | 0              | 3.735274                | 1.100059  | 0.457389  |
| 19               | 1                | 0              | 3.260811                | 1.015066  | -1.241435 |
| 20               | 8                | 0              | 4.046151                | -0.761756 | -0.457009 |
| 21               | 1                | 0              | 4.930087                | -0.524413 | -0.784655 |
| 22               | 8                | 0              | 1.107460                | 1.953876  | -0.001099 |
| 23               | 1                | 0              | -3.586793               | 1.885148  | -0.062931 |
| 24               | 1                | 0              | 0.655312                | 2.331402  | 0.773611  |

• Structure : PC1

Energy : E= -1264.56238570 a.u.

Cartesian coordinates :

Input orientation:

| Center<br>Number | Atomic<br>Number | Atomic<br>Type | Coordinates (Angstroms) |   |   |
|------------------|------------------|----------------|-------------------------|---|---|
|                  |                  |                | X                       | Y | Z |

|    |    |   |           |           |           |
|----|----|---|-----------|-----------|-----------|
| 1  | 14 | 0 | -2.151232 | -0.046323 | -0.025619 |
| 2  | 8  | 0 | -1.832242 | -0.084201 | 1.602420  |
| 3  | 1  | 0 | -0.879264 | -0.182864 | 1.833980  |
| 4  | 8  | 0 | -3.666791 | -0.690601 | -0.258279 |
| 5  | 1  | 0 | -3.920025 | -1.428582 | 0.322233  |
| 6  | 8  | 0 | -2.202896 | 1.507903  | -0.637424 |
| 7  | 1  | 0 | -0.657179 | 2.602778  | -0.674993 |
| 8  | 6  | 0 | -0.810166 | -0.925584 | -1.020652 |
| 9  | 1  | 0 | -0.767761 | -1.994005 | -0.772398 |
| 10 | 1  | 0 | -1.032807 | -0.861488 | -2.091785 |
| 11 | 8  | 0 | 0.485783  | -0.298338 | -0.824966 |
| 12 | 14 | 0 | 1.623901  | -0.736538 | 0.292867  |
| 13 | 8  | 0 | 0.930401  | -0.470380 | 1.791129  |
| 14 | 1  | 0 | 1.273615  | -0.974374 | 2.549149  |
| 15 | 8  | 0 | 1.992901  | -2.358681 | 0.256879  |
| 16 | 1  | 0 | 2.602841  | -2.650271 | -0.442757 |
| 17 | 6  | 0 | 3.119877  | 0.362159  | 0.000505  |
| 18 | 1  | 0 | 3.788049  | 0.318442  | 0.872422  |
| 19 | 1  | 0 | 2.800304  | 1.407977  | -0.114262 |
| 20 | 8  | 0 | 3.809653  | -0.091573 | -1.185337 |
| 21 | 1  | 0 | 4.571427  | 0.494281  | -1.333506 |
| 22 | 8  | 0 | 0.096231  | 3.231803  | -0.684705 |
| 23 | 1  | 0 | -2.846953 | 2.117015  | -0.234937 |
| 24 | 1  | 0 | 0.883211  | 2.662755  | -0.647192 |

## 2. Formation of dimer D2(Si-O-Si)

- Structure : RC

Energy : E= -1264.55822482 a.u.

Cartesian coordinates :

Input orientation:

| Center<br>Number | Atomic<br>Number | Atomic<br>Type | Coordinates (Angstroms) |           |           |
|------------------|------------------|----------------|-------------------------|-----------|-----------|
|                  |                  |                | X                       | Y         | Z         |
| 1                | 14               | 0              | 2.140162                | 0.597196  | -0.157626 |
| 2                | 6                | 0              | 3.914333                | 0.090644  | -0.548619 |
| 3                | 1                | 0              | 4.264164                | 0.632122  | -1.434068 |
| 4                | 1                | 0              | 4.595483                | 0.359214  | 0.272008  |
| 5                | 8                | 0              | 4.049407                | -1.317416 | -0.867508 |
| 6                | 1                | 0              | 3.853352                | -1.831808 | -0.066245 |
| 7                | 8                | 0              | 1.642448                | -0.400218 | 1.070734  |
| 8                | 1                | 0              | 0.673178                | -0.445951 | 1.250768  |
| 9                | 8                | 0              | 2.052111                | 2.222643  | 0.206562  |
| 10               | 1                | 0              | 2.647176                | 2.542592  | 0.905156  |
| 11               | 8                | 0              | 1.105171                | 0.517961  | -1.462621 |
| 12               | 14               | 0              | -2.248480               | -0.651067 | 0.265772  |
| 13               | 8                | 0              | -1.107136               | -0.567710 | 1.488741  |
| 14               | 1                | 0              | -1.374341               | -0.111353 | 2.305778  |
| 15               | 8                | 0              | -3.660684               | -1.169118 | 0.978475  |

|    |   |   |           |           |           |
|----|---|---|-----------|-----------|-----------|
| 16 | 1 | 0 | -4.466224 | -0.749977 | 0.626437  |
| 17 | 6 | 0 | -2.550543 | 0.972520  | -0.651499 |
| 18 | 1 | 0 | -1.944673 | 1.777786  | -0.214975 |
| 19 | 1 | 0 | -2.258392 | 0.875430  | -1.705258 |
| 20 | 8 | 0 | -3.958583 | 1.289850  | -0.545939 |
| 21 | 1 | 0 | -4.116894 | 2.124622  | -1.018491 |
| 22 | 8 | 0 | -1.622544 | -1.730654 | -0.827818 |
| 23 | 1 | 0 | 0.786264  | -0.366517 | -1.708755 |
| 24 | 1 | 0 | -1.315417 | -2.587546 | -0.485097 |

• Structure : TS1  
 Energy : E= -1264.51519529 a.u.  
 Cartesian coordinates :  
 Input orientation:

| Center<br>Number | Atomic<br>Number | Atomic<br>Type | Coordinates (Angstroms) |           |           |
|------------------|------------------|----------------|-------------------------|-----------|-----------|
|                  |                  |                | X                       | Y         | Z         |
| 1                | 14               | 0              | 1.707174                | 0.512562  | 0.114276  |
| 2                | 6                | 0              | 3.240783                | -0.056355 | -0.829076 |
| 3                | 1                | 0              | 3.160027                | 0.237885  | -1.881180 |
| 4                | 1                | 0              | 4.148024                | 0.428469  | -0.438815 |
| 5                | 8                | 0              | 3.412696                | -1.497245 | -0.836296 |
| 6                | 1                | 0              | 3.555087                | -1.791524 | 0.079071  |
| 7                | 8                | 0              | 1.850832                | -0.085550 | 1.671563  |
| 8                | 1                | 0              | 0.960386                | -0.302537 | 2.023106  |
| 9                | 8                | 0              | 1.632215                | 2.187956  | 0.118022  |
| 10               | 1                | 0              | 2.338570                | 2.646452  | 0.603117  |
| 11               | 8                | 0              | 0.300618                | 0.014154  | -0.572095 |
| 12               | 14               | 0              | -1.636389               | -0.421422 | 0.161586  |
| 13               | 8                | 0              | -0.925250               | -0.441342 | 1.682884  |
| 14               | 1                | 0              | -1.555724               | -0.702043 | 2.377031  |
| 15               | 8                | 0              | -3.127678               | -1.134336 | 0.557229  |
| 16               | 1                | 0              | -3.877952               | -0.635177 | 0.187769  |
| 17               | 6                | 0              | -2.150988               | 1.160891  | -0.732858 |
| 18               | 1                | 0              | -1.624719               | 2.017090  | -0.291712 |
| 19               | 1                | 0              | -1.854043               | 1.100828  | -1.787389 |
| 20               | 8                | 0              | -3.581368               | 1.333447  | -0.621947 |
| 21               | 1                | 0              | -3.834059               | 2.121626  | -1.132129 |
| 22               | 8                | 0              | -1.053837               | -1.735625 | -0.912622 |
| 23               | 1                | 0              | -0.052232               | -1.194397 | -0.952825 |

24 1 0 -1.044598 -2.651504 -0.572987

• Structure : **IM**

Energy : E= -1264.54350032 a.u.

Cartesian coordinates :

Input orientation:

| Center Number | Atomic Number | Atomic Type | Coordinates (Angstroms) |           |           |
|---------------|---------------|-------------|-------------------------|-----------|-----------|
|               |               |             | X                       | Y         | Z         |
| 1             | 14            | 0           | -1.798828               | -0.620310 | 0.005261  |
| 2             | 6             | 0           | -2.692323               | 0.809397  | -0.855077 |
| 3             | 1             | 0           | -2.684441               | 0.670039  | -1.940727 |
| 4             | 1             | 0           | -3.738333               | 0.930657  | -0.551049 |
| 5             | 8             | 0           | -1.981470               | 2.071360  | -0.621267 |
| 6             | 1             | 0           | -2.192175               | 2.385025  | 0.275807  |
| 7             | 8             | 0           | -1.972048               | -0.456998 | 1.661657  |
| 8             | 1             | 0           | -1.084195               | -0.333189 | 2.068481  |
| 9             | 8             | 0           | -2.408357               | -2.084049 | -0.517551 |
| 10            | 1             | 0           | -3.319834               | -2.304003 | -0.260538 |
| 11            | 8             | 0           | -0.219502               | -0.583814 | -0.400984 |
| 12            | 14            | 0           | 1.269739                | 0.147313  | 0.185081  |
| 13            | 8             | 0           | 0.777633                | -0.056770 | 1.806264  |
| 14            | 1             | 0           | 1.411781                | 0.338447  | 2.427248  |
| 15            | 8             | 0           | 2.635329                | 1.164800  | 0.609824  |
| 16            | 1             | 0           | 3.458359                | 0.778225  | 0.261214  |
| 17            | 6             | 0           | 2.270369                | -1.141963 | -0.806951 |
| 18            | 1             | 0           | 2.013404                | -2.145089 | -0.438867 |
| 19            | 1             | 0           | 1.960616                | -1.100222 | -1.860149 |
| 20            | 8             | 0           | 3.698717                | -0.930705 | -0.706269 |
| 21            | 1             | 0           | 4.151494                | -1.583732 | -1.265797 |
| 22            | 8             | 0           | 0.622874                | 1.699372  | -0.627602 |
| 23            | 1             | 0           | -0.378647               | 1.887925  | -0.652034 |
| 24            | 1             | 0           | 1.115530                | 2.507707  | -0.388787 |

• Structure : **TS2**

Energy : E= -1264.54179114 a.u.

Cartesian coordinates :

Input orientation:

| Center Number | Atomic Number | Atomic Type | Coordinates (Angstroms) |           |           |
|---------------|---------------|-------------|-------------------------|-----------|-----------|
|               |               |             | X                       | Y         | Z         |
| 1             | 14            | 0           | -1.693845               | -0.732740 | -0.019903 |
| 2             | 6             | 0           | -2.846384               | 0.630833  | -0.641032 |
| 3             | 1             | 0           | -2.864573               | 0.652627  | -1.735313 |
| 4             | 1             | 0           | -3.882893               | 0.515364  | -0.301851 |
| 5             | 8             | 0           | -2.349986               | 1.945052  | -0.232193 |
| 6             | 1             | 0           | -2.547790               | 2.072393  | 0.712040  |

|    |    |   |           |           |           |
|----|----|---|-----------|-----------|-----------|
| 7  | 8  | 0 | -1.696234 | -0.736049 | 1.651026  |
| 8  | 1  | 0 | -0.843155 | -0.402048 | 2.006905  |
| 9  | 8  | 0 | -2.163926 | -2.216549 | -0.613293 |
| 10 | 1  | 0 | -3.093508 | -2.469254 | -0.484191 |
| 11 | 8  | 0 | -0.169200 | -0.473254 | -0.563272 |
| 12 | 14 | 0 | 1.270505  | 0.283119  | 0.009495  |
| 13 | 8  | 0 | 0.908723  | 0.298214  | 1.667492  |
| 14 | 1  | 0 | 1.521586  | 0.819419  | 2.211512  |
| 15 | 8  | 0 | 2.578144  | 1.392365  | -0.158463 |
| 16 | 1  | 0 | 3.406261  | 0.880951  | -0.240210 |
| 17 | 6  | 0 | 2.301011  | -1.258267 | -0.494996 |
| 18 | 1  | 0 | 1.934112  | -2.143624 | 0.042322  |
| 19 | 1  | 0 | 2.171125  | -1.454716 | -1.568634 |
| 20 | 8  | 0 | 3.711887  | -1.060961 | -0.207440 |
| 21 | 1  | 0 | 4.223741  | -1.765808 | -0.638244 |
| 22 | 8  | 0 | 0.315843  | 1.923718  | -0.580939 |
| 23 | 1  | 0 | -0.668360 | 2.017925  | -0.408854 |
| 24 | 1  | 0 | 0.760424  | 2.755773  | -0.336950 |

• Structure : **PC2**

Energy : E= -1264.57168651 a.u.

Cartesian coordinates :

Input orientation:

| Center<br>Number | Atomic<br>Number | Atomic<br>Type | Coordinates (Angstroms) |           |           |
|------------------|------------------|----------------|-------------------------|-----------|-----------|
|                  |                  |                | X                       | Y         | Z         |
| 1                | 14               | 0              | -1.446036               | 0.132991  | 0.444150  |
| 2                | 8                | 0              | -1.699209               | 1.762597  | 0.163927  |
| 3                | 1                | 0              | -2.367018               | 1.975755  | -0.511583 |
| 4                | 8                | 0              | -1.070070               | -0.019266 | 2.052714  |
| 5                | 1                | 0              | -0.202474               | -0.445803 | 2.211878  |
| 6                | 8                | 0              | -0.154010               | -0.375507 | -0.459983 |
| 7                | 6                | 0              | -2.999474               | -0.832766 | 0.018344  |
| 8                | 1                | 0              | -3.773457               | -0.635882 | 0.773815  |
| 9                | 1                | 0              | -2.789638               | -1.911385 | 0.040748  |
| 10               | 8                | 0              | -3.460939               | -0.431490 | -1.291299 |
| 11               | 1                | 0              | -4.271070               | -0.930646 | -1.492121 |
| 12               | 14               | 0              | 1.407290                | -0.886773 | -0.248941 |
| 13               | 8                | 0              | 1.709956                | -2.241850 | -1.159145 |
| 14               | 1                | 0              | 1.153766                | -3.025354 | -1.006838 |
| 15               | 8                | 0              | 1.456806                | -1.188417 | 1.397953  |
| 16               | 1                | 0              | 2.288213                | -1.514309 | 1.782258  |
| 17               | 6                | 0              | 2.670804                | 0.389110  | -0.811945 |
| 18               | 1                | 0              | 3.675078                | -0.043211 | -0.723473 |
| 19               | 1                | 0              | 2.533802                | 0.629908  | -1.876152 |
| 20               | 8                | 0              | 2.666779                | 1.588445  | -0.012475 |
| 21               | 1                | 0              | 1.892494                | 2.148254  | -0.264717 |
| 22               | 8                | 0              | 0.552456                | 3.300739  | -0.620687 |
| 23               | 1                | 0              | -0.243852               | 2.807811  | -0.319061 |

24 1 0 0.679262 3.998155 0.044944

### 3. Formation of dimer D3 (Si-C-O-C-Si)

- Structure : RC

Energy : E= -1264.56453473 a.u.

Cartesian coordinates :

Input orientation:

---

| Center<br>Number | Atomic<br>Number | Atomic<br>Type | Coordinates (Angstroms) |           |           |
|------------------|------------------|----------------|-------------------------|-----------|-----------|
|                  |                  |                | X                       | Y         | Z         |
| 1                | 14               | 0              | -3.039430               | -0.266588 | -0.088745 |
| 2                | 8                | 0              | -3.755466               | 0.406380  | -1.436279 |
| 3                | 1                | 0              | -4.338568               | 1.169879  | -1.286917 |
| 4                | 8                | 0              | -4.138535               | -0.459420 | 1.147186  |
| 5                | 1                | 0              | -4.981427               | -0.899492 | 0.943264  |
| 6                | 8                | 0              | -2.371953               | -1.691841 | -0.622782 |
| 7                | 1                | 0              | -2.870831               | -2.197371 | -1.286697 |
| 8                | 6                | 0              | -1.661248               | 0.758125  | 0.671491  |
| 9                | 1                | 0              | -2.061399               | 1.723971  | 1.009358  |
| 10               | 1                | 0              | -1.256652               | 0.249822  | 1.558629  |
| 11               | 8                | 0              | -0.619118               | 0.969323  | -0.306170 |
| 12               | 6                | 0              | 2.571631                | 1.207364  | 1.155393  |
| 13               | 1                | 0              | 3.560549                | 1.648776  | 1.338444  |
| 14               | 1                | 0              | 2.180606                | 0.868351  | 2.124360  |
| 15               | 14               | 0              | 2.739705                | -0.266699 | -0.009071 |
| 16               | 8                | 0              | 3.467936                | 0.316584  | -1.386851 |
| 17               | 1                | 0              | 3.532355                | -0.294996 | -2.140082 |
| 18               | 8                | 0              | 1.290379                | -1.016505 | -0.307533 |
| 19               | 1                | 0              | 0.504281                | -0.412573 | -0.369145 |
| 20               | 8                | 0              | 3.765248                | -1.411676 | 0.632230  |
| 21               | 1                | 0              | 3.374682                | -2.045508 | 1.256980  |
| 22               | 8                | 0              | 1.687551                | 2.208618  | 0.587660  |
| 23               | 1                | 0              | 0.069038                | 1.558787  | 0.086930  |
| 24               | 1                | 0              | 1.583169                | 2.925949  | 1.236168  |

---

- Structure : TS

Energy : E= -1264.45617471 a.u.

Cartesian coordinates :

Input orientation:

---

| Center<br>Number | Atomic<br>Number | Atomic<br>Type | Coordinates (Angstroms) |           |           |
|------------------|------------------|----------------|-------------------------|-----------|-----------|
|                  |                  |                | X                       | Y         | Z         |
| 1                | 14               | 0              | -2.798581               | -0.204188 | 0.015315  |
| 2                | 8                | 0              | -3.310024               | 0.864272  | -1.163953 |
| 3                | 1                | 0              | -3.647466               | 1.721347  | -0.852772 |
| 4                | 8                | 0              | -3.908994               | -0.279025 | 1.260221  |
| 5                | 1                | 0              | -4.840069               | -0.431297 | 1.024834  |

---

|    |    |   |           |           |           |
|----|----|---|-----------|-----------|-----------|
| 6  | 8  | 0 | -2.602657 | -1.652652 | -0.781856 |
| 7  | 1  | 0 | -3.260947 | -1.875701 | -1.461806 |
| 8  | 6  | 0 | -1.159177 | 0.239981  | 0.828673  |
| 9  | 1  | 0 | -1.306868 | 1.153602  | 1.430683  |
| 10 | 1  | 0 | -0.895505 | -0.561933 | 1.542968  |
| 11 | 8  | 0 | -0.151431 | 0.418001  | -0.143790 |
| 12 | 6  | 0 | 1.856642  | 0.896879  | 1.050724  |
| 13 | 1  | 0 | 2.425527  | 1.781342  | 1.318375  |
| 14 | 1  | 0 | 1.132912  | 0.612921  | 1.809475  |
| 15 | 14 | 0 | 2.661162  | -0.423883 | -0.025735 |
| 16 | 8  | 0 | 3.459216  | 0.411621  | -1.209351 |
| 17 | 1  | 0 | 3.903233  | -0.106283 | -1.902488 |
| 18 | 8  | 0 | 1.523293  | -1.490224 | -0.553036 |
| 19 | 1  | 0 | 0.661016  | -0.959691 | -0.519783 |
| 20 | 8  | 0 | 3.811949  | -1.200667 | 0.888055  |
| 21 | 1  | 0 | 3.503624  | -1.927240 | 1.457036  |
| 22 | 8  | 0 | 1.052784  | 2.614402  | -0.194278 |
| 23 | 1  | 0 | 0.351017  | 1.891950  | -0.313207 |
| 24 | 1  | 0 | 0.719523  | 3.186988  | 0.520086  |

• Structure : **PC3**

Energy : E= -1264.56565732 a.u.

Cartesian coordinates :

Input orientation:

| Center<br>Number | Atomic<br>Number | Atomic<br>Type | Coordinates (Angstroms) |           |           |
|------------------|------------------|----------------|-------------------------|-----------|-----------|
|                  |                  |                | X                       | Y         | Z         |
| 1                | 14               | 0              | 2.694885                | -0.264700 | 0.066608  |
| 2                | 8                | 0              | 2.875112                | 1.257104  | 0.721554  |
| 3                | 1                | 0              | 3.145599                | 1.969041  | 0.117068  |
| 4                | 8                | 0              | 3.940777                | -0.635216 | -0.972222 |
| 5                | 1                | 0              | 4.850415                | -0.571527 | -0.634707 |
| 6                | 8                | 0              | 2.586251                | -1.283317 | 1.374533  |
| 7                | 1                | 0              | 3.114110                | -1.055567 | 2.158765  |
| 8                | 6                | 0              | 1.163509                | -0.528550 | -0.995061 |
| 9                | 1                | 0              | 1.248286                | 0.016830  | -1.946961 |
| 10               | 1                | 0              | 1.092464                | -1.598106 | -1.245535 |
| 11               | 8                | 0              | -0.030540               | -0.120646 | -0.300691 |
| 12               | 6                | 0              | -1.226953               | -0.509384 | -1.006393 |
| 13               | 1                | 0              | -1.300312               | 0.041913  | -1.956003 |
| 14               | 1                | 0              | -1.168097               | -1.578863 | -1.259070 |
| 15               | 14               | 0              | -2.743932               | -0.226867 | 0.073404  |
| 16               | 8                | 0              | -2.969792               | 1.413811  | 0.181250  |
| 17               | 1                | 0              | -3.657425               | 1.731133  | 0.791352  |
| 18               | 8                | 0              | -2.586433               | -0.959280 | 1.561225  |
| 19               | 1                | 0              | -1.736263               | -0.837598 | 2.018180  |
| 20               | 8                | 0              | -4.113520               | -0.865567 | -0.618686 |
| 21               | 1                | 0              | -4.216340               | -1.832126 | -0.592257 |
| 22               | 8                | 0              | 0.089387                | 2.775712  | -0.489088 |
| 23               | 1                | 0              | 0.016402                | 1.802921  | -0.375442 |



24 1 0 1.009720 2.972123 -0.246969

---

**Transition states for the determinant steps for the mechanisms of dimerization with one water molecule:**

• Structure : **D1'**

Energy: E(RM06)= -1340.84904011 a.u.

Cartesian coordinates :

Input orientation:

---

| Center<br>Number | Atomic<br>Number | Atomic<br>Type | Coordinates (Angstroms) |           |           |
|------------------|------------------|----------------|-------------------------|-----------|-----------|
|                  |                  |                | X                       | Y         | Z         |
| 1                | 14               | 0              | -2.414197               | -0.252867 | -0.141747 |
| 2                | 8                | 0              | -2.036792               | -0.704757 | 1.409652  |
| 3                | 1                | 0              | -1.079756               | -0.666975 | 1.659427  |
| 4                | 8                | 0              | -3.668739               | -1.212378 | -0.672156 |
| 5                | 1                | 0              | -3.593210               | -2.165237 | -0.493317 |
| 6                | 8                | 0              | -2.962786               | 1.316614  | -0.224484 |
| 7                | 1                | 0              | 0.099959                | 1.702401  | -0.756117 |
| 8                | 6                | 0              | -0.911730               | -0.338024 | -1.284570 |
| 9                | 1                | 0              | -0.598641               | -1.371440 | -1.456491 |
| 10               | 1                | 0              | -1.138506               | 0.102938  | -2.261973 |
| 11               | 8                | 0              | 0.216287                | 0.402796  | -0.735955 |
| 12               | 14               | 0              | 1.449685                | -0.218396 | 0.378793  |
| 13               | 8                | 0              | 0.723232                | -0.779849 | 1.847185  |
| 14               | 1                | 0              | 0.726424                | -1.752307 | 1.862369  |
| 15               | 8                | 0              | 1.415375                | -1.864386 | -0.231630 |
| 16               | 1                | 0              | 2.150127                | -2.001331 | -0.855492 |
| 17               | 6                | 0              | 3.240395                | 0.137262  | -0.212503 |
| 18               | 1                | 0              | 3.912142                | 0.123992  | 0.658141  |
| 19               | 1                | 0              | 3.287319                | 1.149210  | -0.636356 |
| 20               | 8                | 0              | 3.697490                | -0.823621 | -1.197092 |
| 21               | 1                | 0              | 4.627478                | -0.637473 | -1.408457 |
| 22               | 8                | 0              | 0.272676                | 2.805237  | -0.522816 |
| 23               | 1                | 0              | -3.665491               | 1.572048  | 0.397378  |
| 24               | 1                | 0              | -0.569822               | 3.186672  | -0.206424 |
| 25               | 8                | 0              | 1.532412                | 1.429586  | 1.182429  |
| 26               | 1                | 0              | 1.024123                | 1.434282  | 2.010376  |
| 27               | 1                | 0              | 0.835789                | 2.571549  | 0.309655  |

---

• Structure : **D2'**

Energy: E(RM06)= -1340.85504133 a.u.

Cartesian coordinates :

Input orientation:

---

| Center<br>Number | Atomic<br>Number | Atomic<br>Type | Coordinates (Angstroms) |   |   |
|------------------|------------------|----------------|-------------------------|---|---|
|                  |                  |                | X                       | Y | Z |

---

|    |    |   |           |           |           |
|----|----|---|-----------|-----------|-----------|
| 1  | 14 | 0 | -1.445753 | -0.237675 | 0.248050  |
| 2  | 6  | 0 | -2.924660 | 0.875521  | -0.098445 |
| 3  | 1  | 0 | -3.106043 | 1.537924  | 0.754367  |
| 4  | 1  | 0 | -2.744567 | 1.518831  | -0.970608 |
| 5  | 8  | 0 | -4.148701 | 0.120009  | -0.280387 |
| 6  | 1  | 0 | -4.076988 | -0.381660 | -1.109989 |
| 7  | 8  | 0 | -1.616641 | -0.884393 | 1.768351  |
| 8  | 1  | 0 | -0.755345 | -1.297793 | 2.003685  |
| 9  | 8  | 0 | -1.372985 | -1.367847 | -0.963050 |
| 10 | 1  | 0 | -0.490295 | -1.769373 | -1.165747 |
| 11 | 8  | 0 | -0.035985 | 0.727766  | 0.194396  |
| 12 | 1  | 0 | -0.116060 | 1.855104  | -0.264702 |
| 13 | 14 | 0 | 1.634519  | 0.055081  | 0.257870  |
| 14 | 8  | 0 | 0.088537  | 2.921990  | -0.795736 |
| 15 | 8  | 0 | 2.611705  | 0.452232  | 1.599344  |
| 16 | 8  | 0 | 0.991379  | -1.358495 | 1.156386  |
| 17 | 6  | 0 | 2.014955  | -0.945534 | -1.331335 |
| 18 | 8  | 0 | 2.259838  | 1.540755  | -0.542868 |
| 19 | 1  | 0 | -0.033996 | 3.633758  | -0.138056 |
| 20 | 1  | 0 | 1.080035  | 2.748323  | -0.858665 |
| 21 | 1  | 0 | 2.525023  | -0.221841 | 2.293334  |
| 22 | 1  | 0 | 1.047442  | -2.172902 | 0.626794  |
| 23 | 1  | 0 | 3.089482  | -1.168012 | -1.391584 |
| 24 | 1  | 0 | 1.756952  | -0.340003 | -2.207993 |
| 25 | 8  | 0 | 1.261433  | -2.192280 | -1.374515 |
| 26 | 1  | 0 | 2.880368  | 2.005422  | 0.041591  |
| 27 | 1  | 0 | 1.450866  | -2.649275 | -2.212010 |

• Structure : **D3'**

Energy: E(RM06)= -1340.75263173 a.u.

Cartesian coordinates :

Input orientation:

| Center<br>Number | Atomic<br>Number | Atomic<br>Type | Coordinates (Angstroms) |           |           |
|------------------|------------------|----------------|-------------------------|-----------|-----------|
|                  |                  |                | X                       | Y         | Z         |
| 1                | 14               | 0              | -2.620685               | -0.600768 | 0.056337  |
| 2                | 8                | 0              | -2.878051               | -0.558640 | 1.701573  |
| 3                | 1                | 0              | -2.385484               | -1.199040 | 2.243000  |
| 4                | 8                | 0              | -3.285316               | -1.924796 | -0.691289 |
| 5                | 1                | 0              | -4.237627               | -2.079710 | -0.568721 |
| 6                | 8                | 0              | -3.387553               | 0.746649  | -0.542652 |
| 7                | 1                | 0              | -3.240606               | 1.586906  | -0.075786 |
| 8                | 6                | 0              | -0.780748               | -0.691247 | -0.371356 |
| 9                | 1                | 0              | -0.350248               | -1.581841 | 0.095524  |
| 10               | 1                | 0              | -0.625973               | -0.772085 | -1.453095 |
| 11               | 8                | 0              | -0.077775               | 0.459485  | 0.164643  |
| 12               | 1                | 0              | -0.293806               | 1.246891  | -0.403247 |
| 13               | 8                | 0              | -0.595891               | 2.787969  | -1.212999 |
| 14               | 1                | 0              | -1.539146               | 2.972850  | -1.068898 |

|    |    |   |           |           |           |
|----|----|---|-----------|-----------|-----------|
| 15 | 1  | 0 | -0.125249 | 3.033601  | -0.329305 |
| 16 | 14 | 0 | 2.577680  | -0.646632 | -0.042449 |
| 17 | 8  | 0 | 2.089373  | -1.147035 | -1.535556 |
| 18 | 1  | 0 | 2.789746  | -1.350150 | -2.178765 |
| 19 | 8  | 0 | 1.992151  | -1.576768 | 1.185208  |
| 20 | 1  | 0 | 2.100773  | -2.541210 | 1.116320  |
| 21 | 8  | 0 | 4.239622  | -0.579663 | -0.103165 |
| 22 | 1  | 0 | 4.723278  | -0.494042 | 0.737137  |
| 23 | 6  | 0 | 2.130031  | 1.126849  | 0.342916  |
| 24 | 1  | 0 | 2.324162  | 1.503340  | 1.341252  |
| 25 | 1  | 0 | 2.223537  | 1.875628  | -0.438232 |
| 26 | 8  | 0 | 0.620635  | 2.935488  | 1.031703  |
| 27 | 1  | 0 | 1.405448  | 3.507345  | 0.979281  |

---
